# Supplementary material
Source: PubMed Central journal article supplement (PMC3371279)
Supplement: NIHMS360815-supplement-Supp_Fig_S1.pdf [file NIHMS360815-supplement-Supp_Fig_S1.pdf]

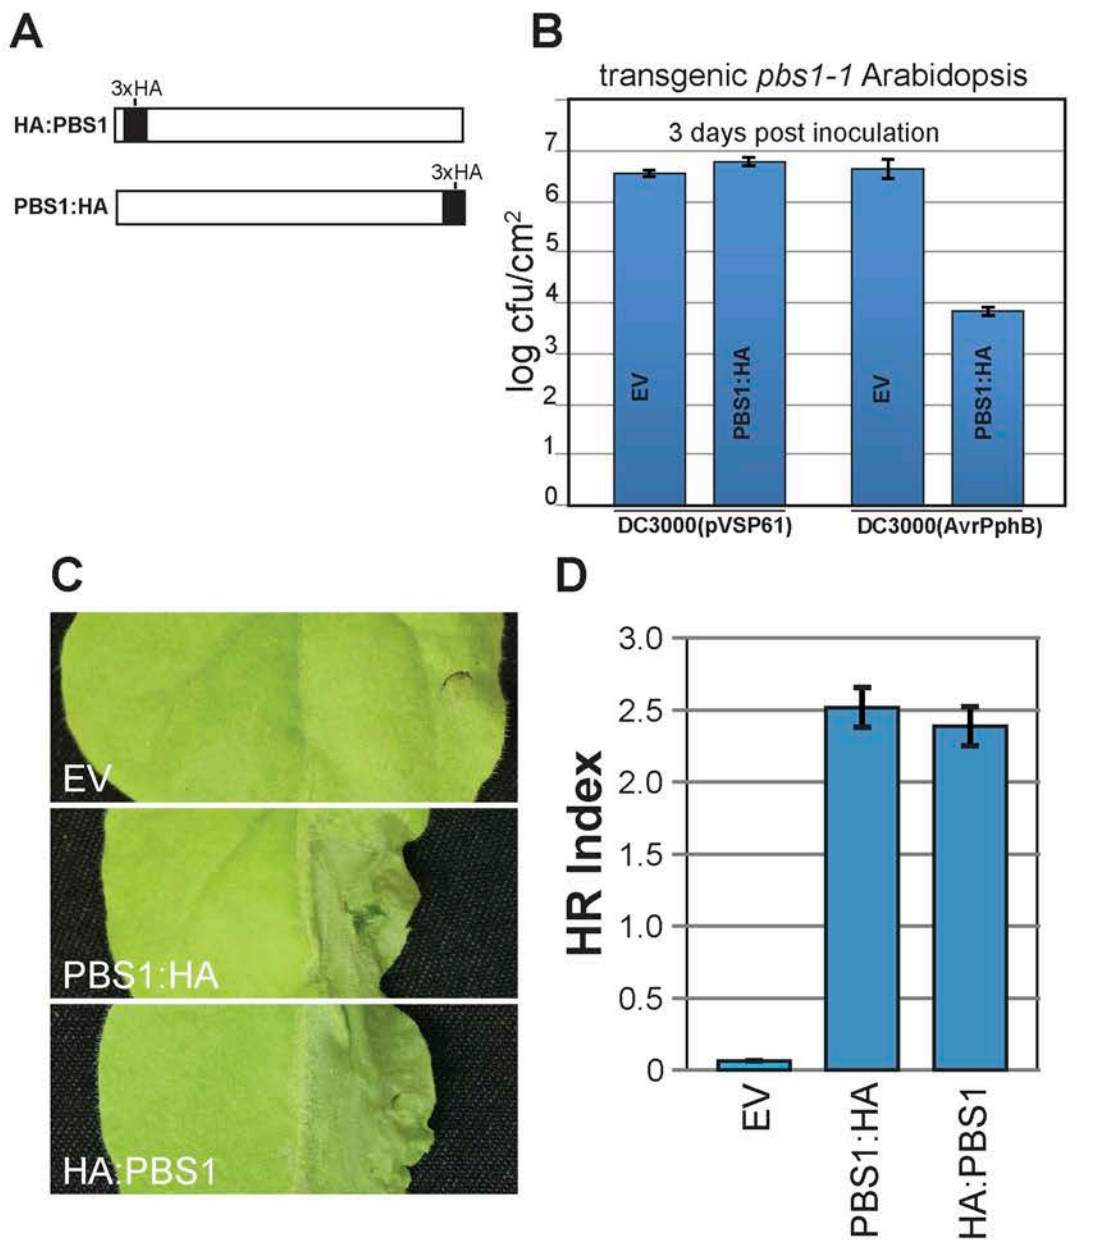

**Fig. S1.** Addition of an N-terminal or C-terminal HA Tag Does Not Affect PBS1 Activation of RPS5.

A. Schematic of HA epitope tagged constructs. To create an N-terminally tagged version of PBS1, without disrupting potential acylation target sequences, we inserted three copies of the HA epitope tag sequence between PBS1 codons 7 and 8. The C-terminally tagged version of PBS1 was created by addition of the 3x HA epitope to the C-terminus of PBS1.

B. *PBS1:HA* expressed under the native *PBS1* promoter complements the *pbs1-1* mutation in Arabidopsis. Bars represent bacterial population levels at three days post inoculation with *Pseudomonas syringae* strains DC3000(pVSP61) (=empty vector) and DC3000(*avrPphB*) in *pbs1-1* mutant Arabidopsis transformed with an empty vector (EV) construct (pJH212B) or with *PBS1:HA*. Error bars represent standard deviation.

C. Representative images of HRs induced by the indicated constructs transiently co-expressed in *N. benthamiana* with RPS5 and AvrPphB. EV, empty vector (pTA7002).

D. Quantification of the HRs in *N. benthamiana* induced by the indicated constructs co-expressed with RPS5 and AvrPphB. Bars represent mean phenotype score for 31 leaves. Error bars indicate standard error. Phenotype scoring was as follows: no discernable difference from uninjected tissue = 0, small patches of necrosis (<25% injected area) = 1, moderate patches of tissue collapse (25-75% of injected area) = 2, large patches to complete collapse (>75% of injected area) = 3.
