# Supplementary material
Source: PubMed Central journal article supplement (PMC3371279)
Supplement: NIHMS360815-supplement-Supp_Fig_S2.pdf [file NIHMS360815-supplement-Supp_Fig_S2.pdf]

**A** Col-0 with Dex-PBS1 N-term+C-term

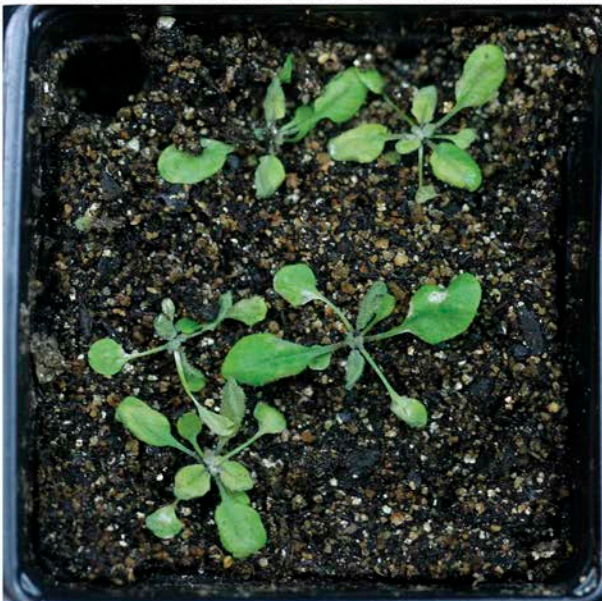

*rps5* with Dex-PBS1 N-term+C-term

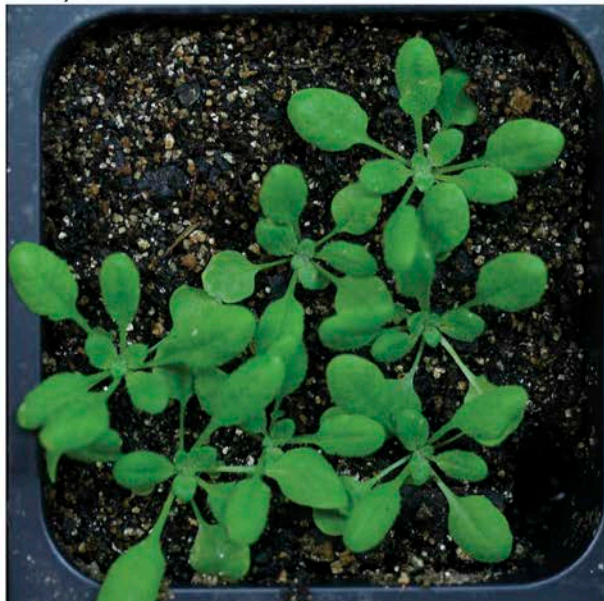

**B** Col-0 *rps5*

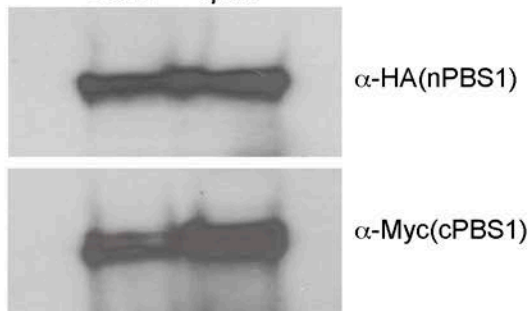

**Fig. S2.** Engineered PBS1 cleavage products activate RPS5 in Arabidopsis.

**A.** Wild-type Col-0 (left) and *rps5* mutant Arabidopsis (right) were transformed with a construct expressing both N- and C-terminal PBS1 cleavage products under control of dexamethasone-inducible promoters. Three-week old seedlings were sprayed with 50  $\mu$ M dexamethasone and photographed four days later. Each pot contains T2 plants (second generation) derived from a single T1 parent and is representative of at least three independent T1 lines. All plants were selected for presence of the transgene prior to dexamethasone treatment.

**B.** Immunoblot showing that engineered cleavage products are expressed at approximately the same levels in wild-type and *rps5* mutant Arabidopsis genotypes shown in panel A.
