# Supplementary material
Source: PubMed Central journal article supplement (PMC3371279)
Supplement: NIHMS360815-supplement-Supp_Fig_S3.pdf [file NIHMS360815-supplement-Supp_Fig_S3.pdf]

**Figure S3**

|                |   |           |                                    |                       |
|----------------|---|-----------|------------------------------------|-----------------------|
|                |   | P         | P                                  |                       |
| A.thaliana     | 1 | MGCFSCFDS | SSDDEKLN                           | PF-----VD             |
| G.max          | 1 | MGCFSCFDS | SSSKEDHNL                          | PF-----RPO--H         |
| R.communis     | 1 | MGCFSCFDS | REEETLNP                           | PF-----QK--S          |
| P.trichocarpa  | 1 | MGCFSCFDS | REEEKLNQ                           | PF-----EKQ--S         |
| S.lycopersicum | 1 | MGCFSCFDS | KEDEKLN                            | PF-----KKD--R         |
| O.sativa       | 1 | MGCFSCFDS | PAEEQLNPKVGGPYG-GGSSSSAAAAAYGGGGSS | AGRHGERGGYPDLHH       |
| Z.mays         | 1 | MGCFSCFDS | PADEQLNPKFGGAGGYGGTSSAVAAYGN       | TGAGVSIGRHGDR--GYPL-- |
| P.taeda        | 1 | MGCFSCFDS | RSSKKS                             | PKSPK-----SSMED       |
| P.patens       | 1 | MGCFSCFDS | KPKERKPLK                          | PF-----RDDNNS         |

|                |    |         |                      |                        |                             |
|----------------|----|---------|----------------------|------------------------|-----------------------------|
| A.thaliana     | 24 | GQKK    | QSTVTSNNISGLPSGGEKLS | SKTNG-GSKRELLPRD---GLG | QIAAHTFAFREL                |
| G.max          | 22 | QPNQ--- | PLPSQISRLPSGADKLSRS  | SNG-GSKRELQQPPP---TVQ  | IAAQTFTFREL                 |
| R.communis     | 22 | DDRK    | QSLTESSNISKLSGADRLRS | RSNG-RSKRELPSPKDGPV    | PGVNMIAAQTFTFREL            |
| P.trichocarpa  | 22 | VDLK    | QTLPPVSSNISKLSGADRFK | RSNNGEQSKRELPSPKD--    | APGVNIAAHTFTFREL            |
| S.lycopersicum | 22 | DDSDRK  | QPEP-PSNISRLSSGADRLK | IRSNG-GSKREFLGLKD--    | APDVQIAAHTFTFREL            |
| O.sativa       | 60 | HHQQ    | QQLPMAAPRVEKLSAGA    | EKTRVKSNA--ILREPS      | APKD--ANGNVISAQTFTFREL      |
| Z.mays         | 57 | ---     | QAPMAAPRVEKLSAAA     | EKARVKSNG--LTK         | EALVPKD--ANGNAISAQTFTFREL   |
| P.taeda        | 23 | TKAG    | QSAASSTHAAKDP        | PESIKSKPSFDS--RRE      | MS--RD---GSQHTAAQTFTFREL    |
| P.patens       | 26 | RDGQ    | SAAANPVAQISKLP       | SGTCNSK-KYDAKGS        | FDKKEPQRE---GSTHIAAQTFTFREL |

|                |     |          |                  |                      |               |
|----------------|-----|----------|------------------|----------------------|---------------|
|                |     | I        |                  | II                   | III           |
|                |     | 95       |                  |                      |               |
| A.thaliana     | 80  | AAATMNFH | PDTFLGEGGFRVYKGR | LDST-----GQVVAVKQLDR | NGLQGNREFLV   |
| G.max          | 73  | AAATKNFR | PESFVGE          | GGFRVYKGRLETT-----   | AQIVAVKQLDR   |
| R.communis     | 81  | AAATKNFR | QESFVGE          | GGFRVYKGRLETT-----   | GQVVAVKQLDR   |
| P.trichocarpa  | 80  | AAATKNFR | PCEFLGEGGFRVYKGR | LEST-----GQVVAVKQLDR | NGLQGNREFLV   |
| S.lycopersicum | 78  | AAATNNFR | PESFVGE          | GGFRVYKGRLEPS-----   | GQVVAVKQLDR   |
| O.sativa       | 116 | ATATRNFR | PCEFLGEGGFRVYKGR | LEST-----GQVVAIKQLNR | DGLQGNREFLV   |
| Z.mays         | 109 | ATATRNFR | PCEFLGEGGFRVYKGR | LEST-----GQVVAIKQLNR | DGLQGNREFLV   |
| P.taeda        | 75  | AAATKNFR | PECLLGE          | GGFRVYKGRLEST-----   | GQVVAVKQLDR   |
| P.patens       | 82  | AAATKNFR | PECLLGE          | GGFRVYKGRLENTGQARVLS | GWLQVVAVKQLDR |

|                |     |         |                    |                      |                 |
|----------------|-----|---------|--------------------|----------------------|-----------------|
|                |     | III     | IV                 | V                    | VIa             |
| A.thaliana     | 131 | EVLMLSL | LHHPNLVNLIGYCADGDQ | RLLVYEFMPLGSLEDHLHDL | PPDKEALDWNTRMKI |
| G.max          | 124 | EVLMLSL | LHHPNLVNLIGYCADGDQ | RLLVYEFMPLGSLEDHLHDL | PPDKEPLDWNTRMKI |
| R.communis     | 132 | EVLMLSL | LHHPNLVNLIGYCADGDQ | RLLVYEFMPLGSLEDHLHDL | PPDKEPLDWNTRMKI |
| P.trichocarpa  | 131 | EVLMLSL | LHHPNLVNLIGYCADGDQ | RLLVYEFMPLGSLEDHLHDL | PPDKEPLDWNTRMKI |
| S.lycopersicum | 128 | EVLMLSL | LHHPNLVNLIGYCADGDQ | RLLVYEFMPLGSLEDHLHDL | PPDKEPLDWNTRMKI |
| O.sativa       | 167 | EVLMLSL | LHHPNLVNLIGYCADGDQ | RLLVYEFMPLGSLEDHLHDL | PPDKEALDWNTRMKI |
| Z.mays         | 160 | EVLMLSL | LHHPNLVNLIGYCADGDQ | RLLVYEFMPLGSLEDHLHDL | PPDKEALDWNTRMKI |
| P.taeda        | 126 | EVLMLSL | LHHPNLVNLIGYCADGDQ | RLLVYEFMPLGSLEDHLHDL | PPDKEPLDWNTRMKI |
| P.patens       | 142 | EVLMLSL | LHHPNLVNLIGYCADGDQ | RLLVYEFMPLGSLEDHLHDL | PPDKECLDWNTRMKI |

|                |     |        |                  |                    |                       |
|----------------|-----|--------|------------------|--------------------|-----------------------|
|                |     | VIa    | VIb              | VII                | VIII                  |
| A.thaliana     | 191 | AAGAAK | GLEYLHDKANPPVIYR | DFKSSNILLDEGFHPKLS | SDFGLAKLGPTGDKSHVSTRV |
| G.max          | 184 | AVGAAK | GLEYLHDKANPPVIYR | DFKSSNILLDEGFHPKLS | SDFGLAKLGPVGDKSHVSTRV |
| R.communis     | 192 | AAGAAK | GLEYLHDKANPPVIYR | DFKSSNILLDEGFHPKLS | SDFGLAKLGPTGDKSHVSTRV |
| P.trichocarpa  | 191 | AAGAAK | GLEYLHDKANPPVIYR | DFKSSNILLDEGFHPKLS | SDFGLAKLGPTGDKSHVSTRV |
| S.lycopersicum | 188 | ASGAAK | GLEYLHDKANPPVIYR | DFKSSNILLDEGFHPKLS | SDFGLAKLGPTGDKSHVSTRV |
| O.sativa       | 227 | AAGAAK | GLEYLHDKANPPVIYR | DFKSSNILLDESHPKLS  | SDFGLAKLGPVGDKSHVSTRV |
| Z.mays         | 220 | AAGAAK | GLEYLHDKANPPVIYR | DFKSSNILLDESHPKLS  | SDFGLAKLGPVGDKSHVSTRV |
| P.taeda        | 186 | AAGAAK | GLEYLHDKANPPVIYR | DFKSSNILLDEGFHPKLS | SDFGLAKLGPVGDKSHVSTRV |
| P.patens       | 202 | AAGAAK | GLEYLHDKANPPVIYR | DFKSSNILLDEGFHPKLS | SDFGLAKLGPVGDKSHVSTRV |

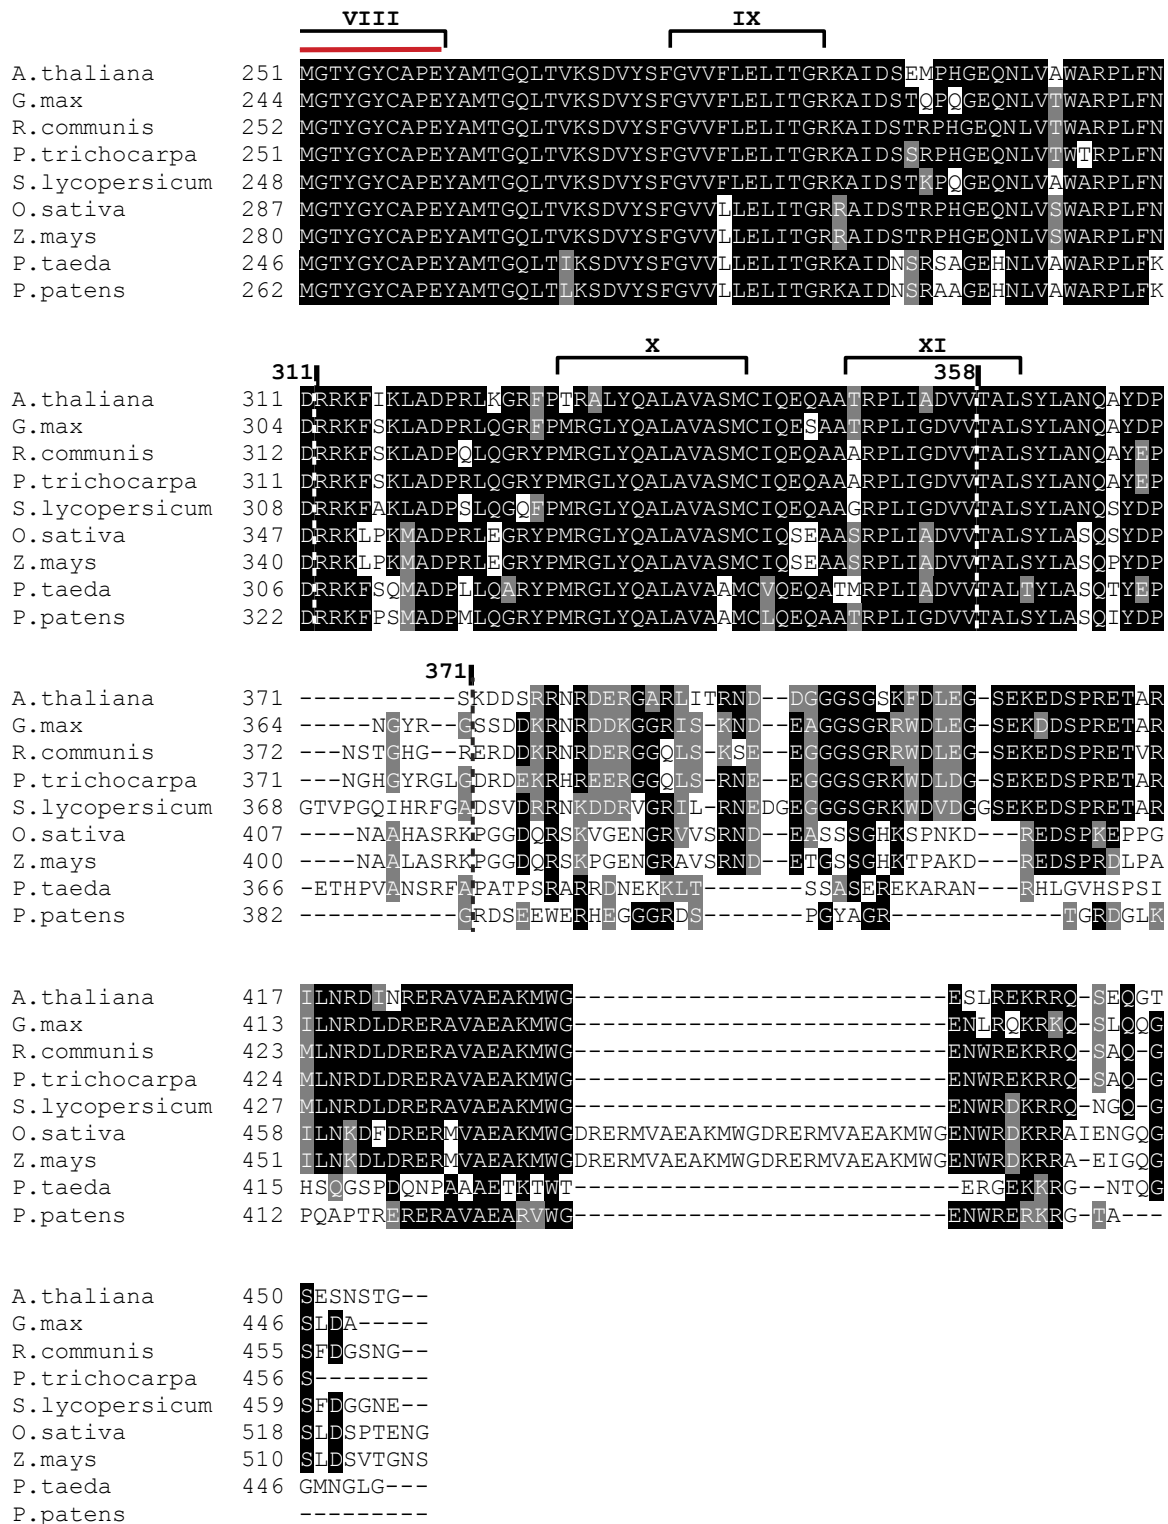

**Figure S3. Alignment of PBS1 Orthologues.** Amino acid sequences were aligned using ClustalW2, with default parameters selected. The alignment output was converted to a visual representation using Boxshade 3.21 using the default parameters. Conserved protein kinase domains of PBS1 are indicated with brackets above the alignment. Potential palmitoylation (P) sites are indicated above the alignment. The position of the N- and C-terminal truncations of PBS1 are indicated above the alignment with a vertical line and the position of the terminal amino acid. The activation segment is indicated by the red bar and the site of cleavage by AvrPphB is indicated by a vertical arrow within the red bar.
